# Supplementary material for: Evaluation of risk-based travel policy for the COVID-19 epidemic in Scotland: a population-based surveillance study
Source: PubMed Central journal article supplement (PMC11624746; doi:10.1136/bmjopen-2024-085332), 2024-11-29
Supplement: bmjopen-14-11-s001.pdf [file bmjopen-14-11-s001.pdf]

# Evaluation of risk-based travel policy for the COVID-19 epidemic in Scotland: a population-based surveillance study

## Supplementary Material

**Authors:** Isobel McLachlan<sup>1,†</sup>, Selene Huntley<sup>1,†</sup>, Kirstin Leslie<sup>1,†</sup>, Jennifer Bishop<sup>1</sup>, Christopher Redman<sup>1</sup>, Gonzalo Yebra<sup>1</sup>, Sharif Shaaban<sup>1</sup>, Nicolaos Christofidis<sup>1</sup>, Samantha Lycett<sup>2</sup>, Matthew T.G. Holden<sup>1,3</sup>, David L. Robertson<sup>1,4</sup>, Alison Smith-Palmer<sup>1</sup>, Joseph Hughes<sup>1,4</sup>, Sema Nickbakhsh<sup>1,5,\*</sup>

### Affiliations

<sup>1</sup>Public Health Scotland, Gyle Square, 1 South Gyle Crescent, Edinburgh EH12 9EB, United Kingdom

<sup>2</sup>Roslin Institute, Easter Bush Campus, University of Edinburgh, Edinburgh, EH25 9RG, United Kingdom

<sup>3</sup>School of Medicine, University of St Andrews, North Haugh, St Andrews, KY16 9TF, United Kingdom

<sup>4</sup>MRC-University of Glasgow Centre for Virus Research, 464 Bearsden Road, Glasgow, G61 1QH, United Kingdom

<sup>5</sup>School of Biodiversity, One Health & Veterinary Medicine, Garscube Campus, University of Glasgow, Glasgow, G61 1QH, United Kingdom

<sup>†</sup>Shared first authors

\*Corresponding authors: Dr. Sema Nickbakhsh ([sema.nickbakhsh@phs.scot](mailto:sema.nickbakhsh@phs.scot))

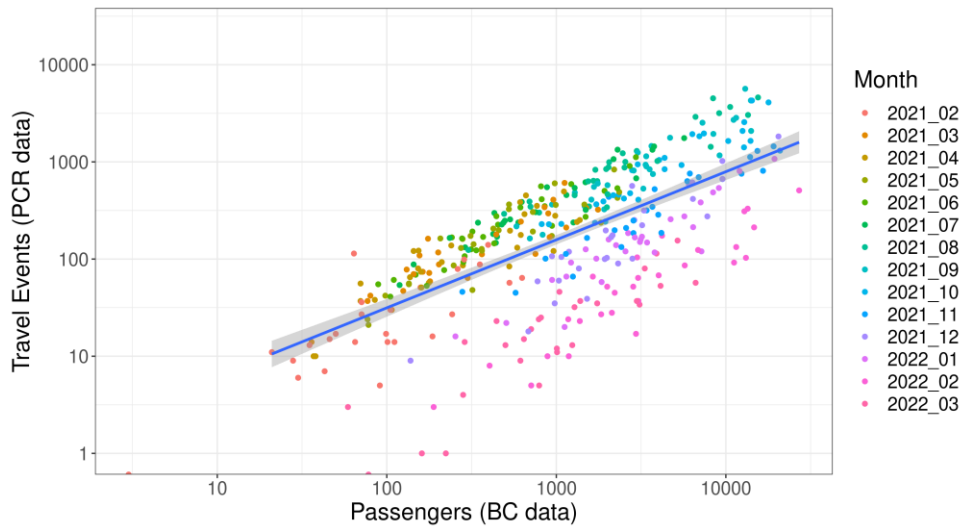

**Figure S1. Assessing correlation between data sources informing on international travel frequency.** Weekly numbers of passengers arriving into Scotland (based on Border Control Passenger Locator Forms) and international travel events (based on COVID-19 PCR-test surveillance data).

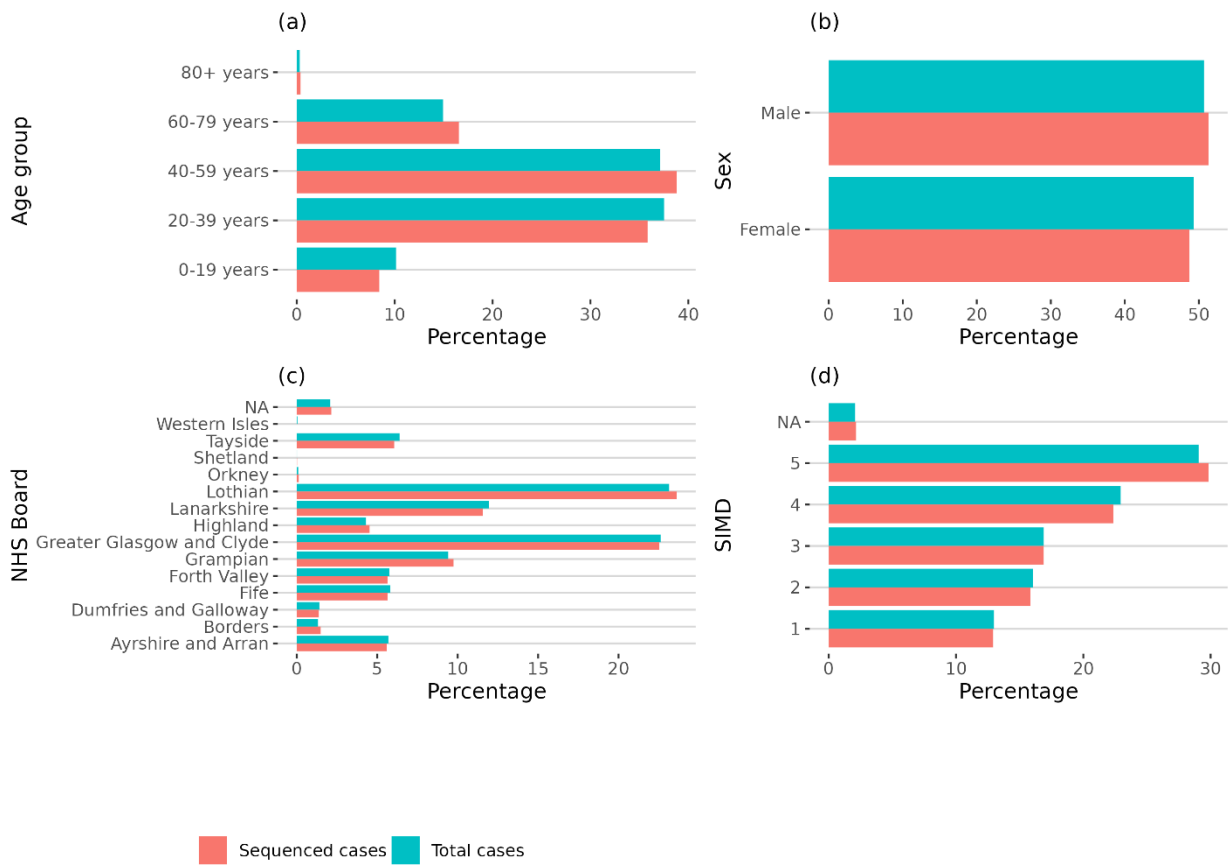

**Figure S2. Demographic and geographic distributions of total COVID-19 cases and sequenced COVID-19 cases in Scotland.** Distributions are shown by (a) age, (b) sex, (c) NHS Board of residence, and (d) Scottish Multiple Index of Deprivation (SIMD) of NHS Board residence; an increasing score reflects decreasing deprivation. NA refers to laboratory records that were not linkable to the factor of interest by postcode.

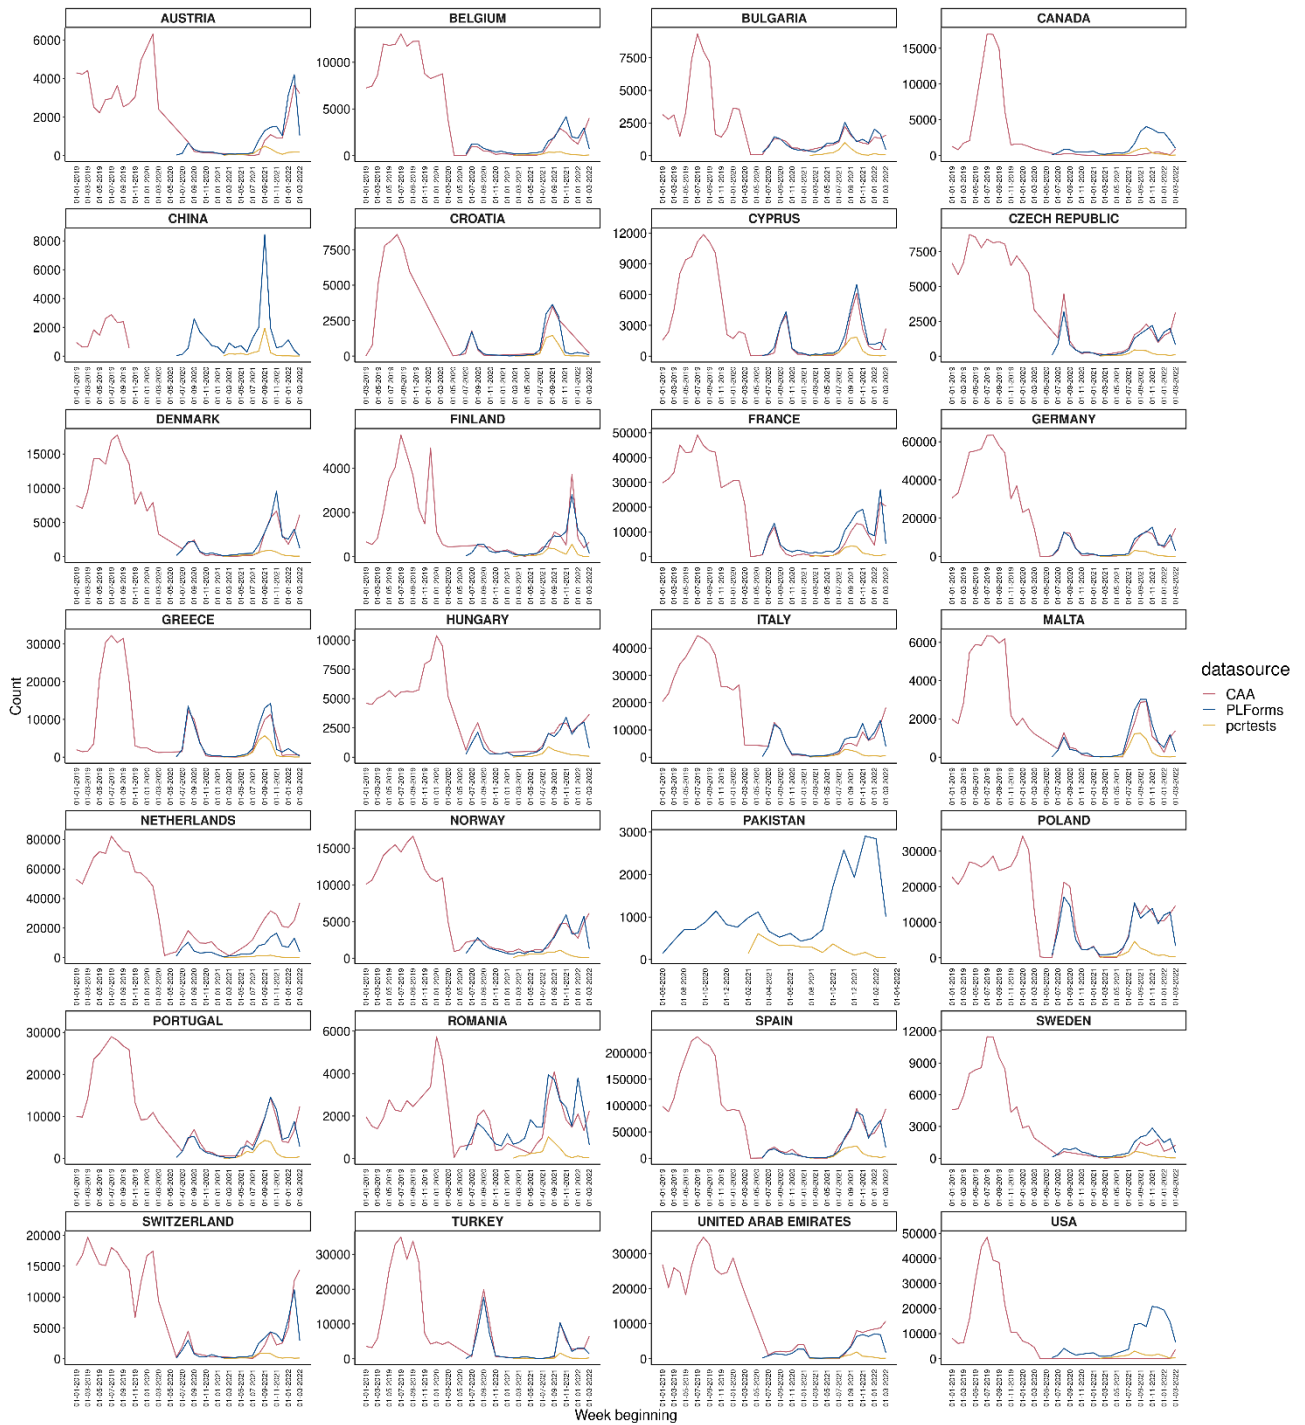

**Figure S3. Comparing longitudinal trends in weekly frequency of international travel by Scottish residents across data sources.** January 2019 to March 2022. BC = Border Control (Passenger Locator Forms); CAA = Civil Aviation Authority; PCR test = SARS-CoV-2 tested individuals with a recent international travel event.

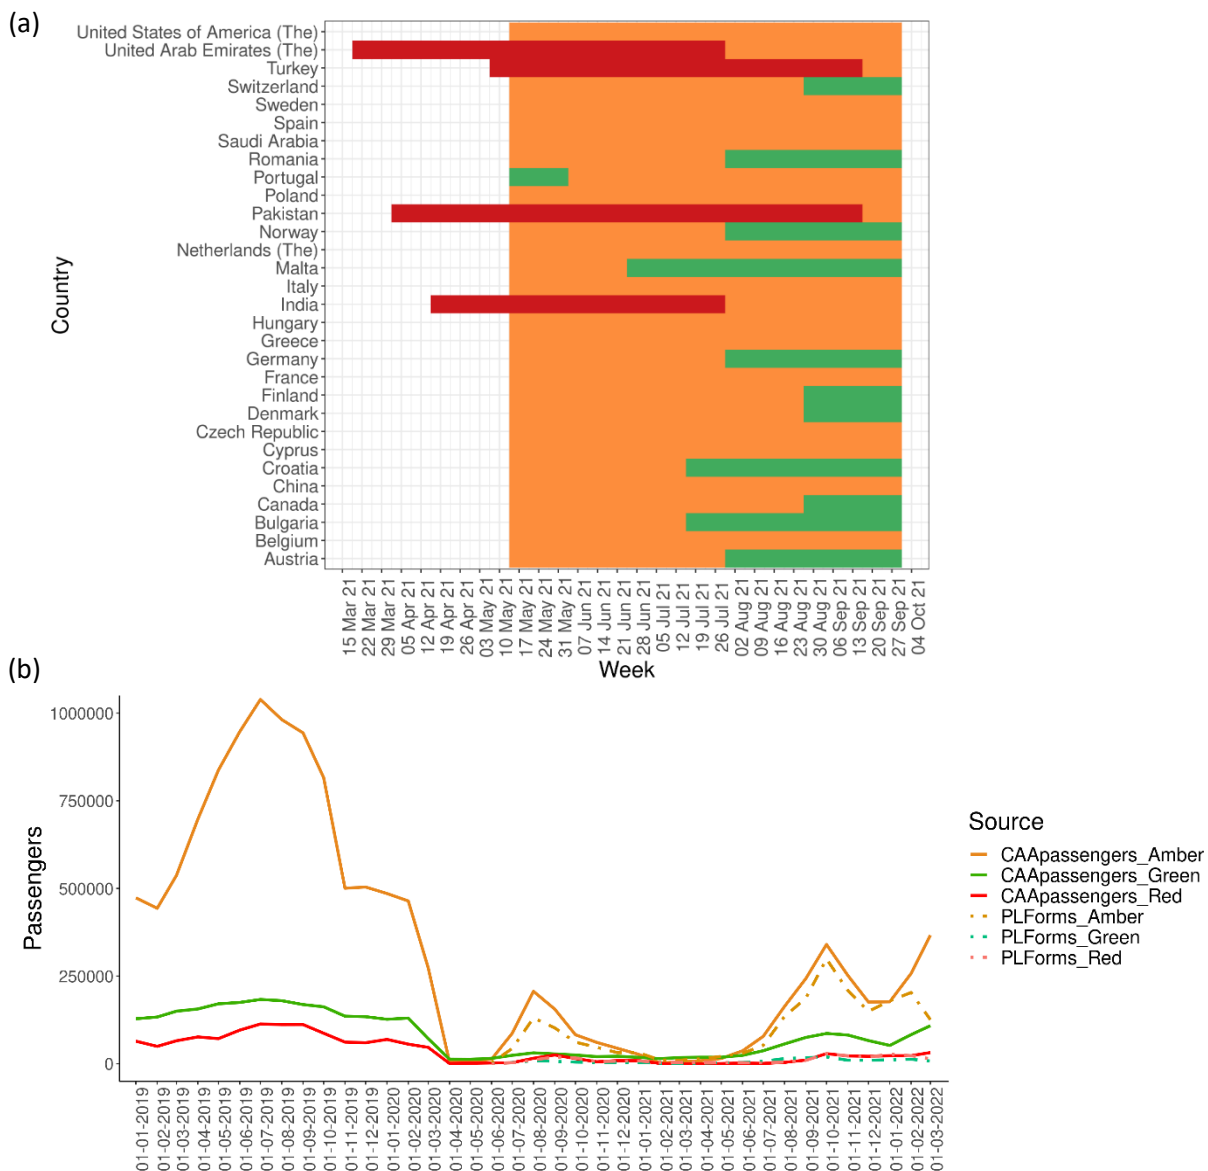

**Figure S4. Assessing the impact of the traffic light system on travel frequency in Scotland.** (a) Summary of Red-Amber-Green list designations in each week of the traffic light period shown for the top 30 most frequently visited countries (as determined based on COVID-19 PCR-tested Scottish residents). (b) Weekly numbers of passengers into Scotland retrospectively applying Red-Amber-Green (RAG) group classifications from the traffic light period to the travel destinations in Civil Aviation Authority and Passenger Locator Form datasets, to compare periods spanning pre-and-post introduction of the traffic light system.

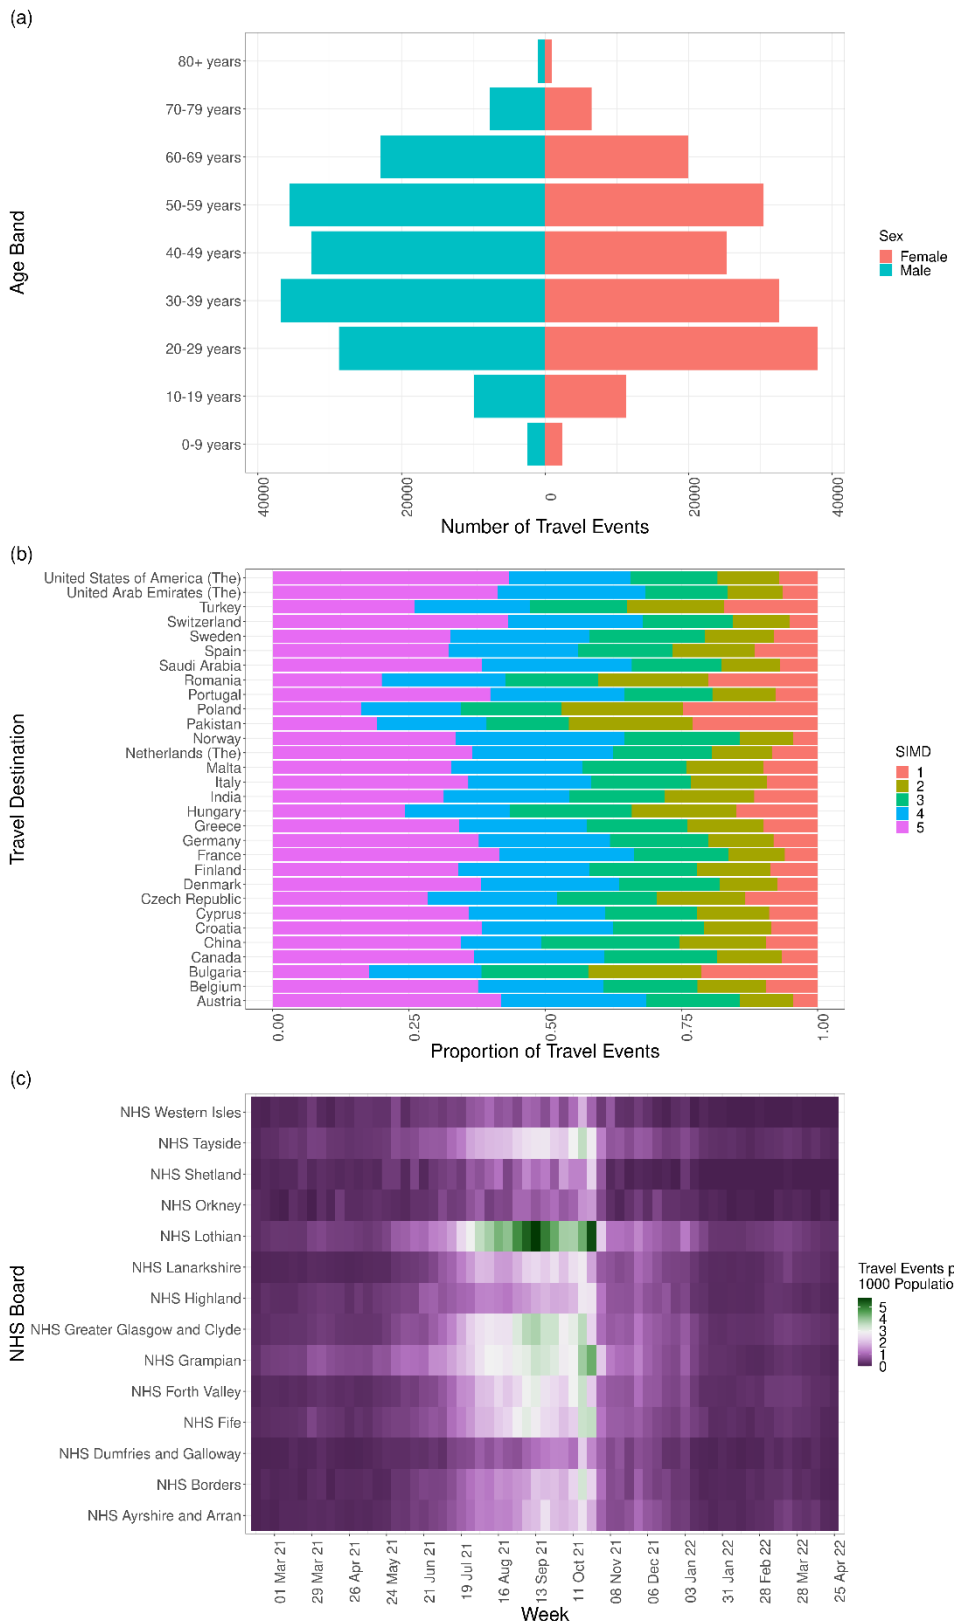

**Figure S5. Demographic and geographic distributions of Scottish residents with an international travel event within 14-days of requesting a COVID-19 PCR-test, w/c 15<sup>th</sup> February 2021 to w/c 24<sup>th</sup> April 2022.** Distributions are shown by (a) age-sex, (b) Scottish Multiple Index of Deprivation; SIMD (an increasing score reflects decreasing deprivation), and (c) by NHS Board of residence.

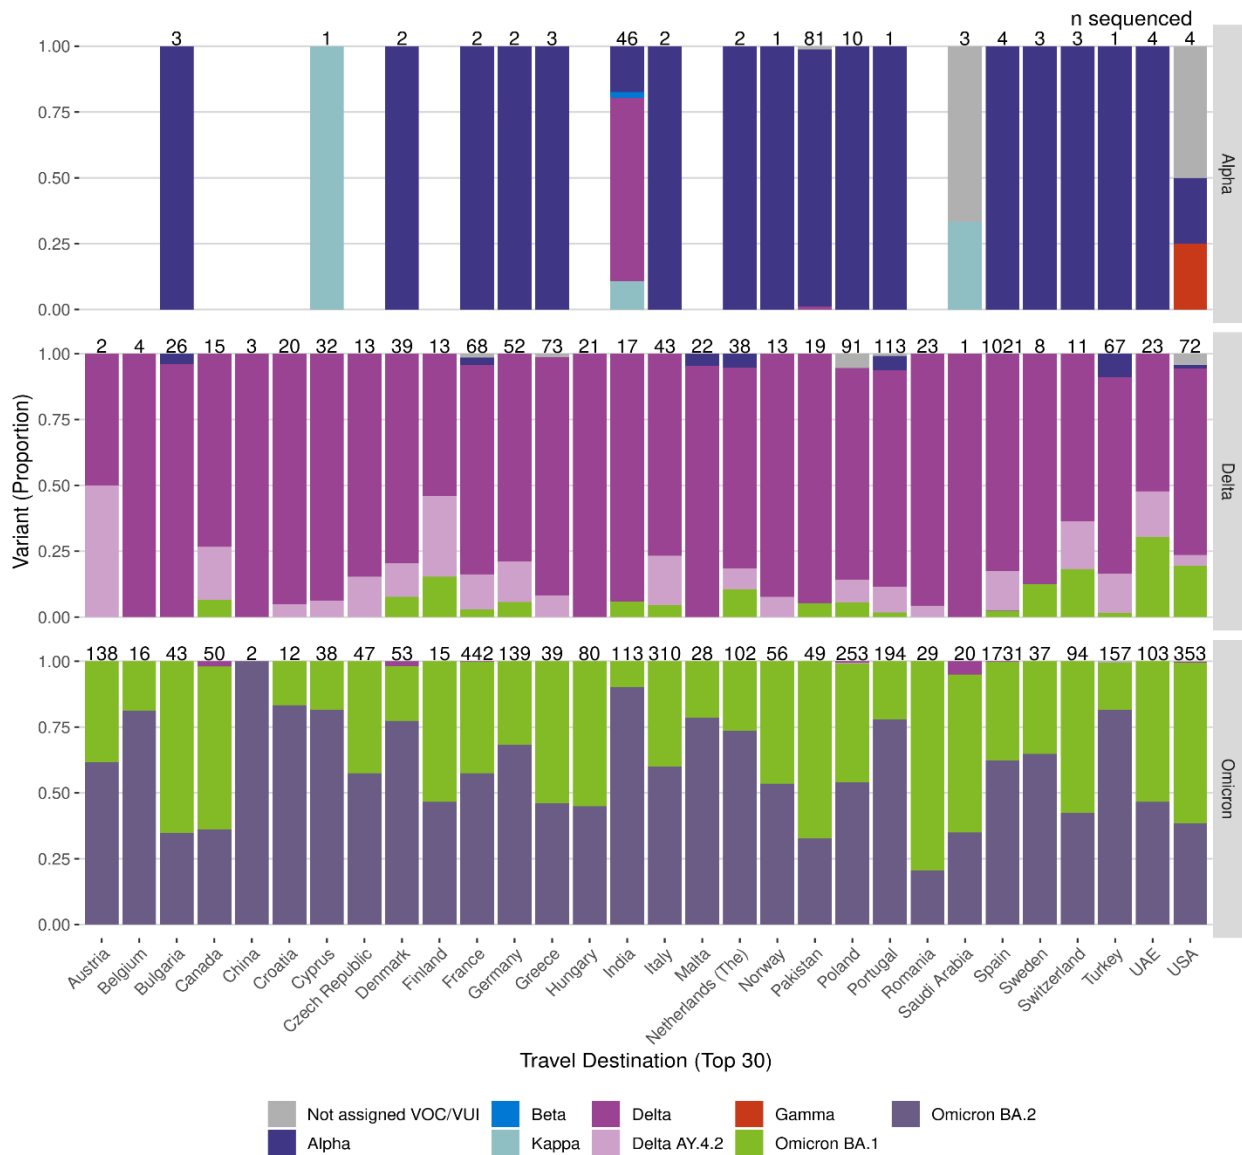

**Figure S6. Proportion of PCR-confirmed SARS-CoV-2 cases who had undergone whole genome sequencing and classified infected with a SARS-CoV-2 Variant of Concern.** Data are shown from travellers to top-30 destinations during periods of Alpha, Delta, and Omicron dominance.

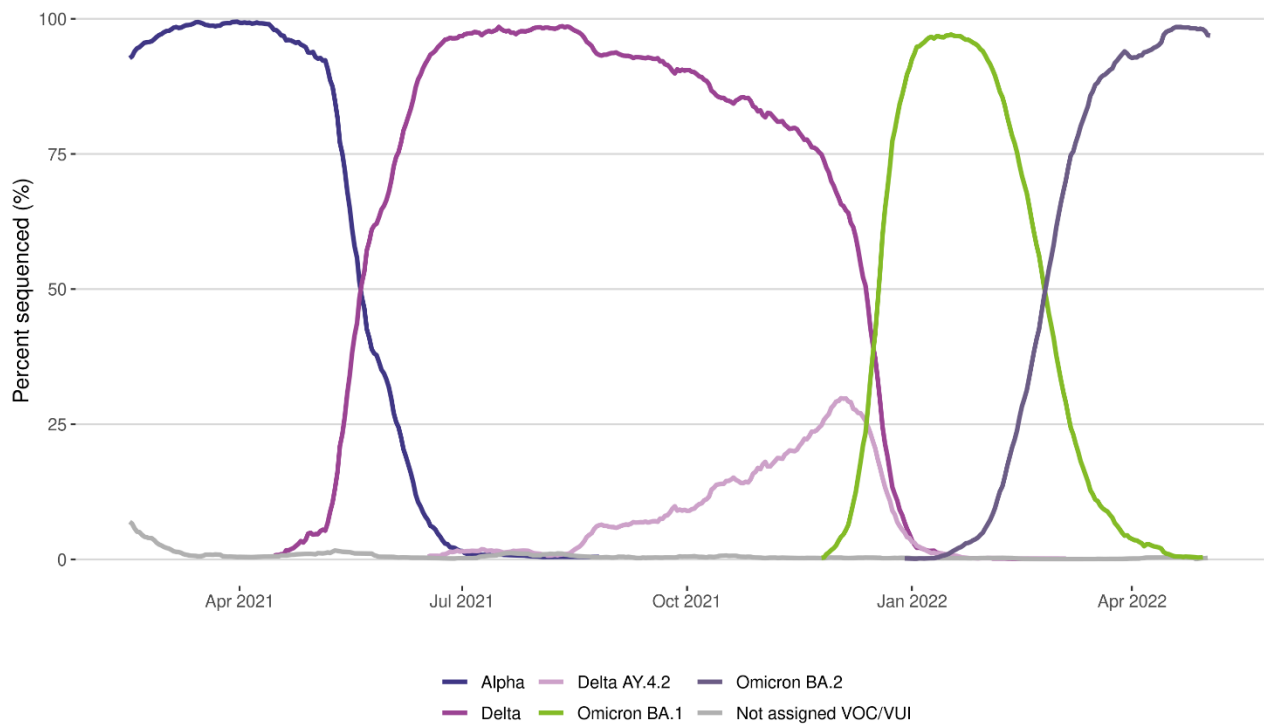

**Figure S7. Epidemic curve of dominant SARS-CoV-2 Variants of Concern identified by whole genome sequencing in the Scottish population during the study period (15<sup>th</sup> February 2021 to 3<sup>rd</sup> May 2022).**
